# Supplementary material
Source: MDPI journal article supplement (https://www.mdpi.com/2072-4292/16/10/1753)
Supplement: s1 [file s1]

## Supporting Information

### [Global wavenumber spectra of sea surface salinity in the mesoscale range]

#### Contents of this file

Figures S1 to S4

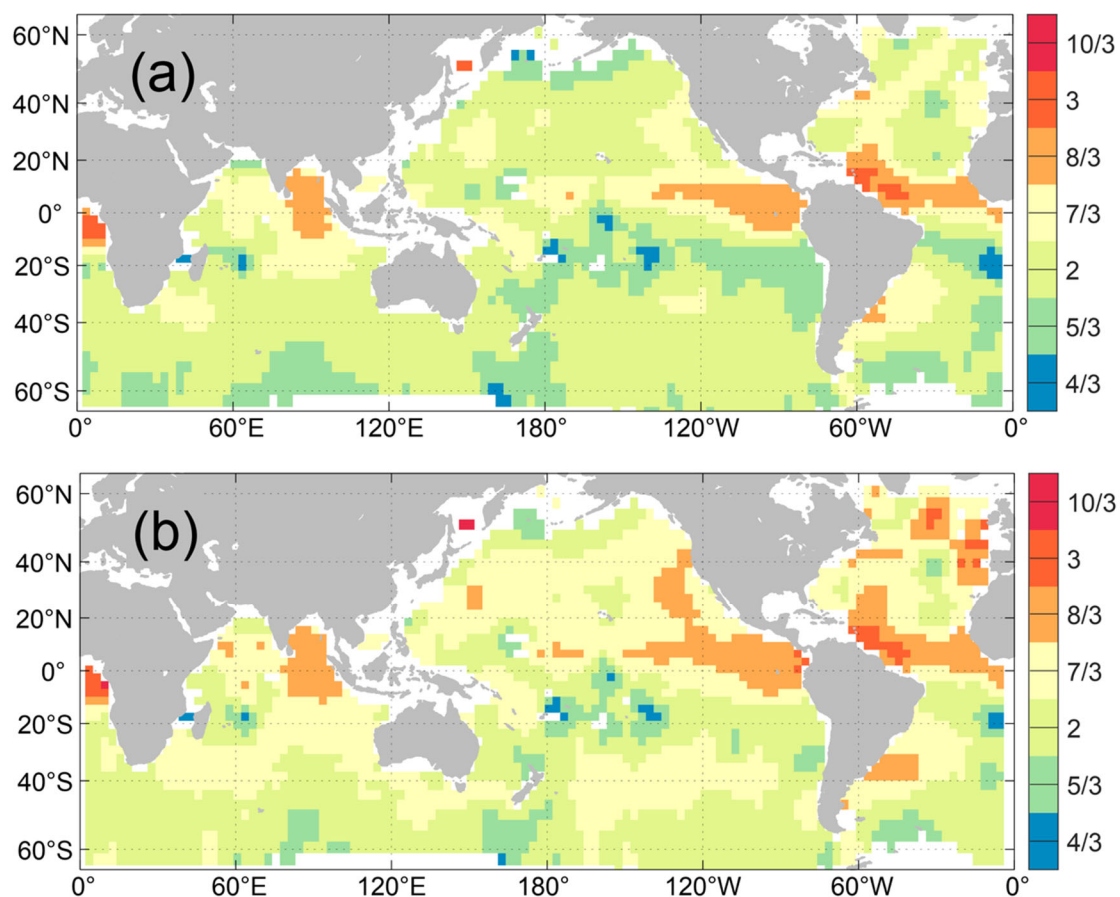

**Figure S1.** Results of the noise level sensitivity test by (a) decreasing and (b) increasing the noise level by 10%. Global pattern of the spectral slope ( $\times -1$ ) estimated from mean SSS wavenumber spectrum after noise level removal (e.g., figure 1b, black curve). Unit is  $\log(\text{PSU}^2)/\log(\text{km}^{-1})$ .

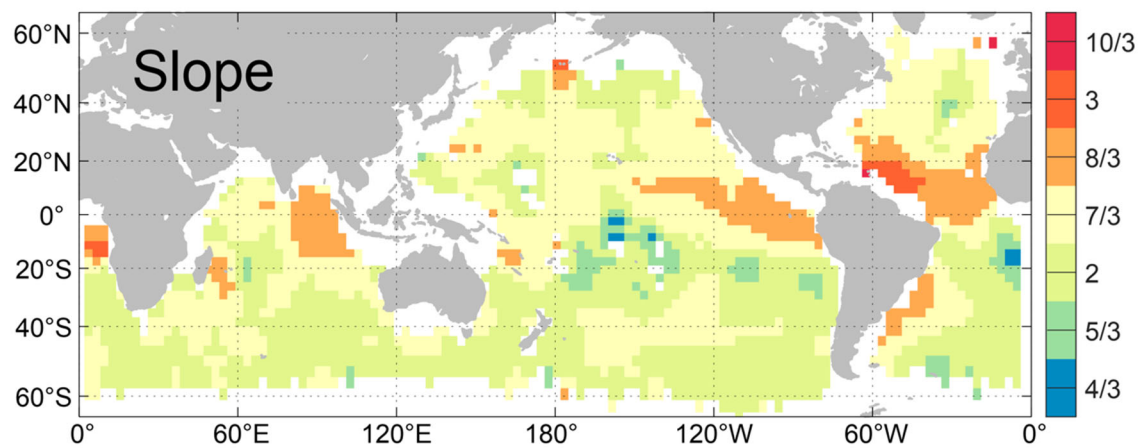

**Figure S2.** (a) Same as figure 4b but for the 20° by 20° bin box.

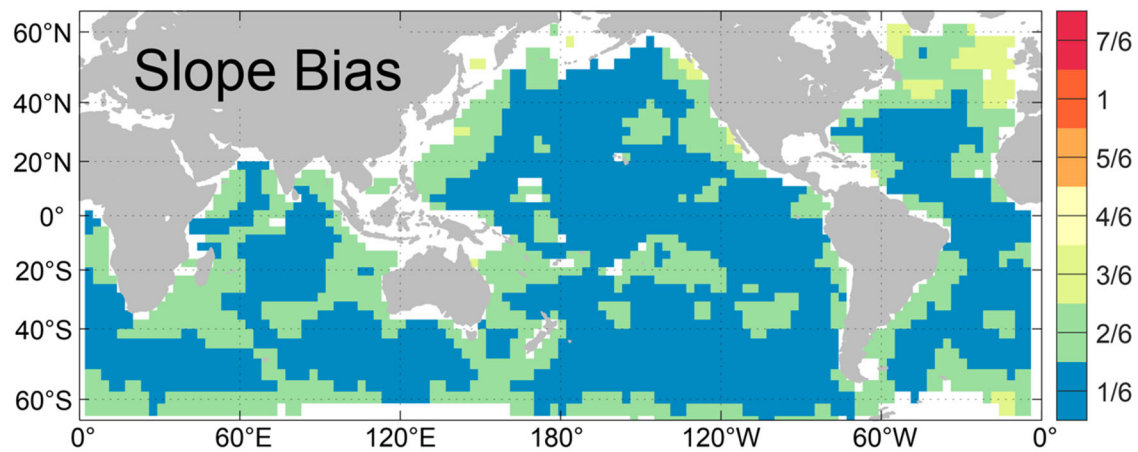

**Figure S3.** The bias of the spectral slope at 95% confidence levels. Unit is  $\log(\text{PSU}^2)/\log(\text{km}^{-1})$ .

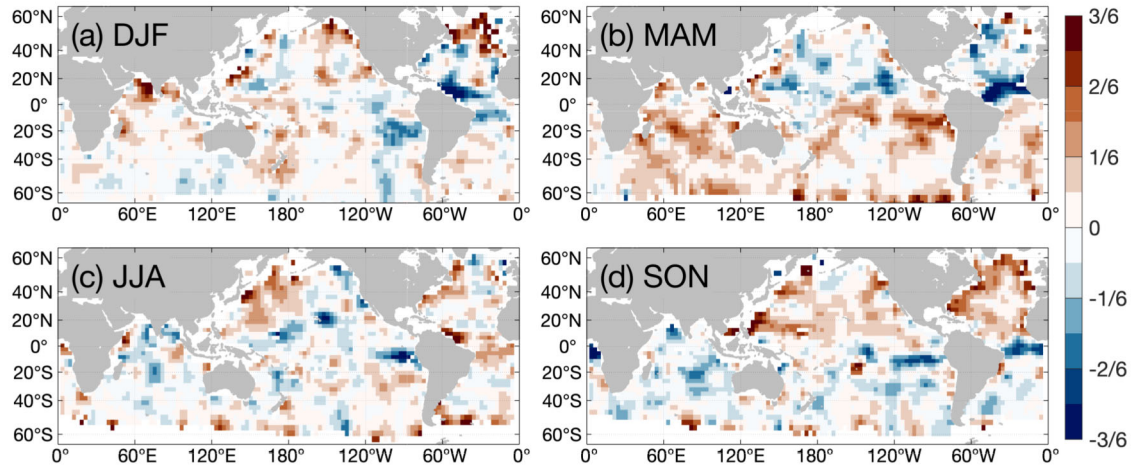

**Figure S4.** Seasonal anomaly pattern of spectral slope ( $\times -1$ ) estimated from mean SSS variance spectrum after noise level removal during boreal (a) December to February (DJF); (b) March to May (MAM); (c) June to August (JJA); (d) September to November (SON). Unit is  $\log(\text{PSU}^2)/\log(\text{km}^{-1})$ .
